# Supplementary material for: A sex-ratio Meiotic Drive System in Drosophila simulans. II: An X-linked Distorter
Source: PLOS journal article supplement (doi:10.1371/journal.pbio.0050293), 2007-10-30
Supplement: S3 (10.1371/journal.pbio.0050293.s003) [file journal.pbio.0050293.s003]

**Text S3:** Some Primers Used in this Study

5Dox14k.F1 gtgcgtatGagtaacccacagtttggtctg

5Dox14k.R1 aaaaacttagGatcggacgggactcGaaat

5Dox14k.F3 TAATATGCCCACCAAGAGTCTACAAATACACG

5Dox14k.R5 AGCCGATAAGTATGAATTTCGTTTCGATTCAA

5Dox14k.F6 AAGTCGAGTTCTCAATAATCCCTGTCCACTTA

5Dox14k.R3 CCACAATGCGCTTATTTAGAATGTGTGTTC

DoxF2 cagtttctatcgaaaactagagtccaaaggctacg

DoxR2 agaaggttccttagagtttggcgactaccatgtgc

3Dox31k.F1 gccctatttAgagaGcttcacctttatgtttct

3Dox31k.R1 gcaattagcatttaattgtgcgaaccaaactat

DoxF4 AAGCAGTTCCCAAAGAAAGAGAGCAGAGCAACT

DoxR4 CCAGCTCAAAACCACAGGGAGACACTGTACATA

sim_cg32702F1 gtactgccatcgttgaCcaaaacaaattcc

sim_cg32702R1 ggatgcagtcttagtcccaaAgtagattgc

sim_cg32702F2 Tggtaaatggttaccacaatagcgtccaat

sim_cg32702R2 aatatgacactttcacCtggacctgggaCg

sim_cg32702R3 ATCTTCTACTCCGCAATGGAAACGATGAAG

sim_cg32702F3 CTTGTAGTACTTTGGATTGTCCTCGCCACA

kl5F tagatgtgcacagtcgtgat

kl5R tcgctaattaaggcaaagtc

kl2F gaacctcctcgtggaatcaa

kl2R taatggcacccttccttcag

kl3F agttagtggcaatgaacggg

kl3R acttccccaagcatgtaacg

ks1F tgcacaaaatgcccttgata

ks1R aatttcgaggtcgcattcac

ks2F gcacaggcattcattttcct

ks2R4 cctgcatattcgcctgaaat

nmyIRF ATTACTGCCACTCTCCGACG

nmyR3004 TACAACACGTCGATACGATTC

RpL32f1 ccttccagcttcaagatgacc

RpL32r2 tcaagaatcttaagcttactcg

cg32702seqR26 ACACAGCTTCTCGGATGACC

cg32702seqF26 GGAGGTCTGGCCATTGAATA
